# Supplementary material
Source: HighWire-hosted journal article supplement (https://bjgp.org/highwire/filestream/43144/field_highwire_adjunct_files/0/BJGP.2021.0419_suppl.pdf)
Supplement: BJGP.2021.0419_suppl.pdf [file BJGP.2021.0419_suppl.pdf]

**Table S1. Classification codes for service outcomes**

| Service outcome                   | Included services                 | Danish National Health Service Register service codes |
|-----------------------------------|-----------------------------------|-------------------------------------------------------|
| Annual chronic care consultations | Annual chronic care consultations | 0120 (daytime)                                        |
| Chronic care procedures           | Lung function tests               | 7113 (daytime)                                        |
|                                   | Blood glucose measures            | 7136 (daytime)                                        |
|                                   | Electrocardiograms                | 7156 (daytime)                                        |
|                                   | Home blood pressure measures      | 2146 (daytime)                                        |
| Outreach home visits              | Outreach home visits              | 0120 (daytime)                                        |
| Talk therapy                      | Talk therapy                      | 6101 (daytime)                                        |
| General contacts                  | Consultations                     | 0101 (daytime)                                        |
|                                   | E-mail contacts                   | 0105 (daytime)                                        |
|                                   | Telephone contacts                | 0201 (daytime)                                        |
|                                   | Ordinary home visits              | 04XX (daytime)                                        |

**Table S2. Coding of covariates**

| Covariate           | Coding levels | Description                                                                                                                                                               |
|---------------------|---------------|---------------------------------------------------------------------------------------------------------------------------------------------------------------------------|
| Ethnicity           | Danish        | Danish origin, immigrants from western countries, or immigrants from non-western countries                                                                                |
|                     | Western       |                                                                                                                                                                           |
|                     | Non-western   |                                                                                                                                                                           |
| Cohabitation status | Cohabiting    | Living together as married/partners or single living                                                                                                                      |
|                     | Single        |                                                                                                                                                                           |
| Household income    | 1st quartile  | Family disposable income (i.e. income after taxes and interest rates) adjusted for household composition according to the modified OECD scale and divided into quartiles. |
|                     | 2nd quartile  |                                                                                                                                                                           |
|                     | 3rd quartile  |                                                                                                                                                                           |
|                     | 4th quartile  |                                                                                                                                                                           |
| Employment          | Employed      | Employed (including students), or unemployed (including sickness benefits, pensioners, early retirement and disability pensioners)                                        |
|                     | Unemployed    |                                                                                                                                                                           |
| Education           | < 10 years    | Educational level was classified according to the UNESCO classification as low ( $\leq 10$ years), medium (10–15 years), and high education ( $> 15$ years).              |
|                     | 10-15 years   |                                                                                                                                                                           |
|                     | > 15 years    |                                                                                                                                                                           |
|                     | Unknown       |                                                                                                                                                                           |

Table S3. The Danish Multimorbidity Index coding definitions<sup>a</sup>

| Category                            | Disease group                       | Coding definition                                                                                                                       | Diagnosis codes (ICD-10)           | Diagnosis time frame | Drug codes (ATC)                      | Prescription time frame |
|-------------------------------------|-------------------------------------|-----------------------------------------------------------------------------------------------------------------------------------------|------------------------------------|----------------------|---------------------------------------|-------------------------|
| <b>Circulatory system</b>           | Hypertension                        | Diagnosis AND/OR prescriptions of antihypertensives, if not ischemic heart disease or heart failure (or kidney disease: only diuretics) | I10-I13, I15                       | Ever                 | C02, C04, C07, C08, C09, C03          | Twice last year         |
|                                     | Dyslipidaemia                       | Diagnosis AND/OR drug prescription for lipid-lowering drugs if not ischemic heart disease.                                              | E78                                | Last two years       | C10                                   | Twice last year         |
|                                     | Ischaemic heart disease             | Diagnosis AND/OR prescription for antianginal drug                                                                                      | I20-I25                            | Ever                 | C01DA                                 | Twice last year         |
|                                     | Atrial fibrillation                 | Diagnosis                                                                                                                               | I48                                | Ever                 |                                       |                         |
|                                     | Heart failure                       | Diagnosis                                                                                                                               | I50                                | Ever                 |                                       |                         |
|                                     | Peripheral artery occlusive disease | Diagnosis                                                                                                                               | I70-I74                            | Ever                 |                                       |                         |
|                                     | Stroke                              | Diagnosis                                                                                                                               | I60-I64, I69                       | Ever                 |                                       |                         |
| <b>Endocrine system</b>             | Diabetes mellitus                   | Diagnosis AND/OR prescription of antidiabetics                                                                                          | E10-E14                            | Ever                 | A10A, A10B                            | Twice last year         |
|                                     | Thyroid disorder                    | Diagnosis AND/OR prescription of thyroid therapy drugs                                                                                  | E00-E05, E061-E069, E07            | Last two years       | H03                                   | Twice last year         |
|                                     | Gout                                | Diagnosis                                                                                                                               | E79, M10                           | Ever                 |                                       |                         |
| <b>Pulmonary system and allergy</b> | Chronic pulmonary disease           | Prescription for obstructive airway disease drugs                                                                                       |                                    |                      | R03                                   | Twice last year         |
|                                     | Allergy                             | Prescription for non-sedative antihistamines AND/OR nasal antiallergics                                                                 |                                    |                      | R06AX, R06AE07, R06AE09, R01AC, R01AD | Twice last year         |
| <b>Gastrointestinal system</b>      | Ulcer/chronic gastritis             | Diagnosis                                                                                                                               | K221, K25-K28, K293-K295           | Ever                 |                                       |                         |
|                                     | Chronic liver disease               | Diagnosis                                                                                                                               | B16-B19, K70-K74, K766, I85        | Ever                 |                                       |                         |
|                                     | Inflammatory bowel disease          | Diagnosis                                                                                                                               | K50-K51                            | Ever                 |                                       |                         |
|                                     | Diverticular disease of intestine   | Diagnosis                                                                                                                               | K57                                | Ever                 |                                       |                         |
| <b>Urogenital system</b>            | Chronic kidney disease              | Diagnosis                                                                                                                               | N03, N11, N18-N19                  | Ever                 |                                       |                         |
|                                     | Prostate disorders                  | Diagnosis AND/OR prescription of prostate hyperplasia therapy drugs                                                                     | N40                                | Ever                 | C02CA, G04C                           | Twice last year         |
| <b>Musculoskeletal system</b>       | Connective tissue disorders         | Diagnosis                                                                                                                               | M05-M06, M08-M09, M30-M36, D86     | Ever                 |                                       |                         |
|                                     | Osteoporosis                        | Diagnosis AND/OR prescription for osteoporosis drugs                                                                                    | M80-M82                            | Ever                 | M05B, G03XC01, H05AA                  | Twice last year         |
|                                     | Painful condition                   | Repeated prescriptions of analgesics                                                                                                    |                                    |                      | N02A, N02BA51, N02BE, M01A, M02A      | Four times last year    |
| <b>Haematological system</b>        | HIV/AIDS                            | Diagnosis                                                                                                                               | B20-B24                            | Ever                 |                                       |                         |
|                                     | Anaemias                            | Diagnosis                                                                                                                               | D50-D53, D55-D59, D60-D61, D63-D64 | Last two years       |                                       |                         |
| <b>Cancers</b>                      | Cancer                              | Diagnosis                                                                                                                               | C00-C43, C45-C97                   | Last five years      |                                       |                         |
| <b>Neurological system</b>          | Vision problem                      | Diagnosis                                                                                                                               | H40, H25, H54                      | Ever                 |                                       |                         |
|                                     | Hearing problem                     | Diagnosis                                                                                                                               | H90-H91, H931                      | Ever                 |                                       |                         |
|                                     | Migraine                            | Diagnosis AND/OR prescription of specific anti-migraine drugs                                                                           | G43                                | Last two years       | N02C                                  | Twice last year         |

|                                 |                                            |                                                              |                    |                |       |                 |
|---------------------------------|--------------------------------------------|--------------------------------------------------------------|--------------------|----------------|-------|-----------------|
|                                 | Epilepsy                                   | Diagnosis AND prescription of anti-epileptics                | G40-G47            | Ever           | N03   | Twice last year |
|                                 | Parkinson's disease                        | Diagnosis                                                    | G20-G22            | Ever           |       |                 |
|                                 | Multiple sclerosis                         | Diagnosis                                                    | G35                | Ever           |       |                 |
|                                 | Neuropathies                               | Diagnosis                                                    | G50-G64            | Last two years |       |                 |
| <b>Mental health conditions</b> | Mood, stress-related, or anxiety disorders | Diagnosis                                                    | F32-F34, F40-F48   | Last two years |       |                 |
|                                 | Psychological distress                     | Prescription of antidepressants if not other mental disorder |                    |                | N06A  | Twice last year |
|                                 | Alcohol problems                           | Diagnosis                                                    | F101-F109          | Last two years |       |                 |
|                                 | Substance abuse                            | Diagnosis                                                    | F11-F16, F18-F19   | Last two years |       |                 |
|                                 | Anorexia/bulimia                           | Diagnosis                                                    | F50                | Last two years |       |                 |
|                                 | Bipolar affective disorder                 | Diagnosis AND/OR prescription of lithium salts               | F30-F31            | Ever           | N05AN | Twice last year |
|                                 | Schizophrenia or schizoaffective disorder  | Diagnosis                                                    | F20, F25           | Ever           |       |                 |
|                                 | Dementia                                   | Diagnosis AND/OR prescription of anti-dementia drugs         | F00-F03, F051, G30 | Ever           | N06D  | Twice last year |

Abbreviations: ICD-10, International Classification of Diseases, version 10; ATC, Anatomical Therapeutic Chemical Classification System; HIV, human immunodeficiency virus; AIDS, acquired immunodeficiency syndrome.

ICD-10 diagnosis code recorded or redeemed prescription of ATC-coded drug registered within defined time frames in national health registers (the Danish National Patient Register, the Danish Psychiatric Central Register, and the Danish National Prescription Registry.)

<sup>a</sup>Prior A, Fenger-Grøn M, Larsen KK, et al. The association between perceived stress and mortality among people with multimorbidity: A prospective population-based cohort study. *Am J Epidemiol.* 2016;184(3):199-210. doi:10.1093/aje/kwv324

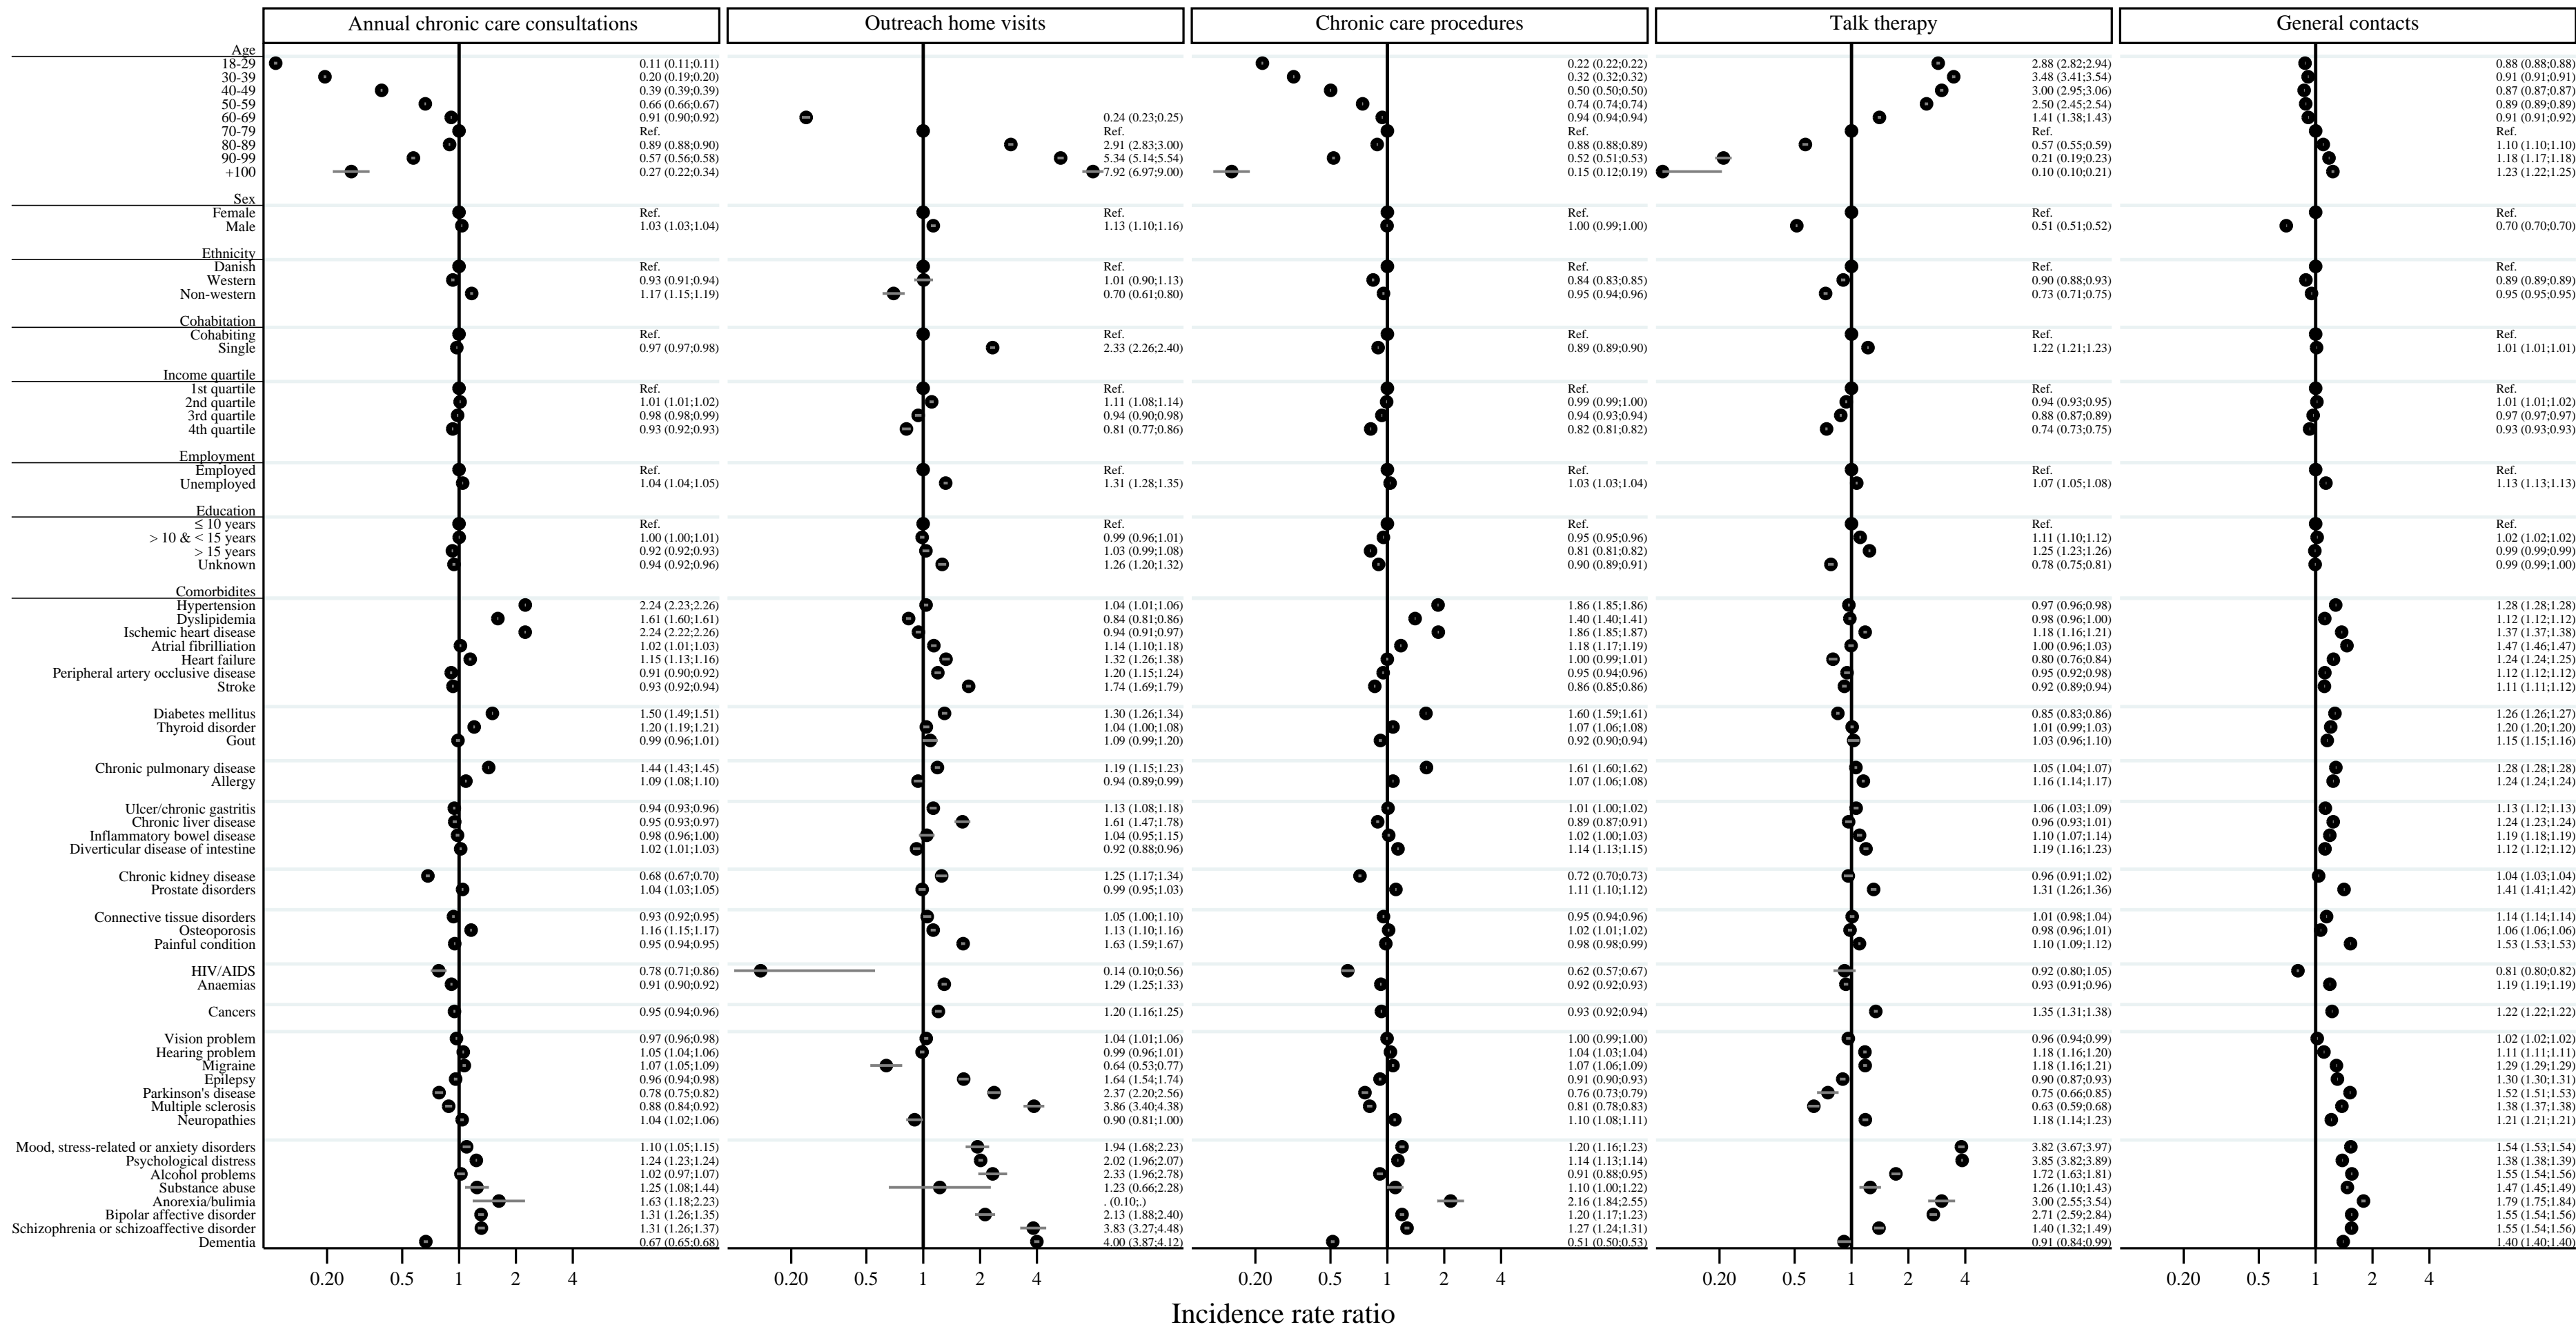

Figure S1. Associations between patient characteristics and chronic care services

**Table S4. Association between GP service outcomes and number of patient comorbidities**

| Service outcome                   | IRR (95% CI)*           |                   |                   |                   |                   |
|-----------------------------------|-------------------------|-------------------|-------------------|-------------------|-------------------|
|                                   | Number of comorbidities |                   |                   |                   |                   |
|                                   | 0                       | 1                 | 2                 | 3                 | 4+                |
| Annual chronic care consultations | 1 (Ref.)                | 3.49 (3.46, 3.52) | 5.18 (5.13, 5.22) | 6.22 (6.16, 6.28) | 6.66 (6.60, 6.73) |
| Chronic care procedures           | 1 (Ref.)                | 2.15 (2.14, 2.17) | 2.98 (2.96, 3.00) | 3.58 (3.56, 3.60) | 3.95 (3.93, 3.97) |
| Outreach home visits              | 1 (Ref.)                | 1.85 (1.70, 2.02) | 2.80 (2.58, 3.04) | 3.64 (3.36, 3.95) | 5.92 (5.47, 6.40) |
| Talk therapy                      | 1 (Ref.)                | 1.85 (1.83, 1.86) | 2.09 (2.07, 2.12) | 2.21 (2.17, 2.24) | 2.57 (2.53, 2.61) |
| General contacts                  | 1 (Ref.)                | 1.66 (1.66, 1.67) | 2.24 (2.23, 2.24) | 2.77 (2.76, 2.77) | 3.87 (3.87, 3.88) |

\*Adjusted for all demographic and socioeconomic factors

Abbreviations: IRR: Incidence rate ratio, CI: Confidence interval.

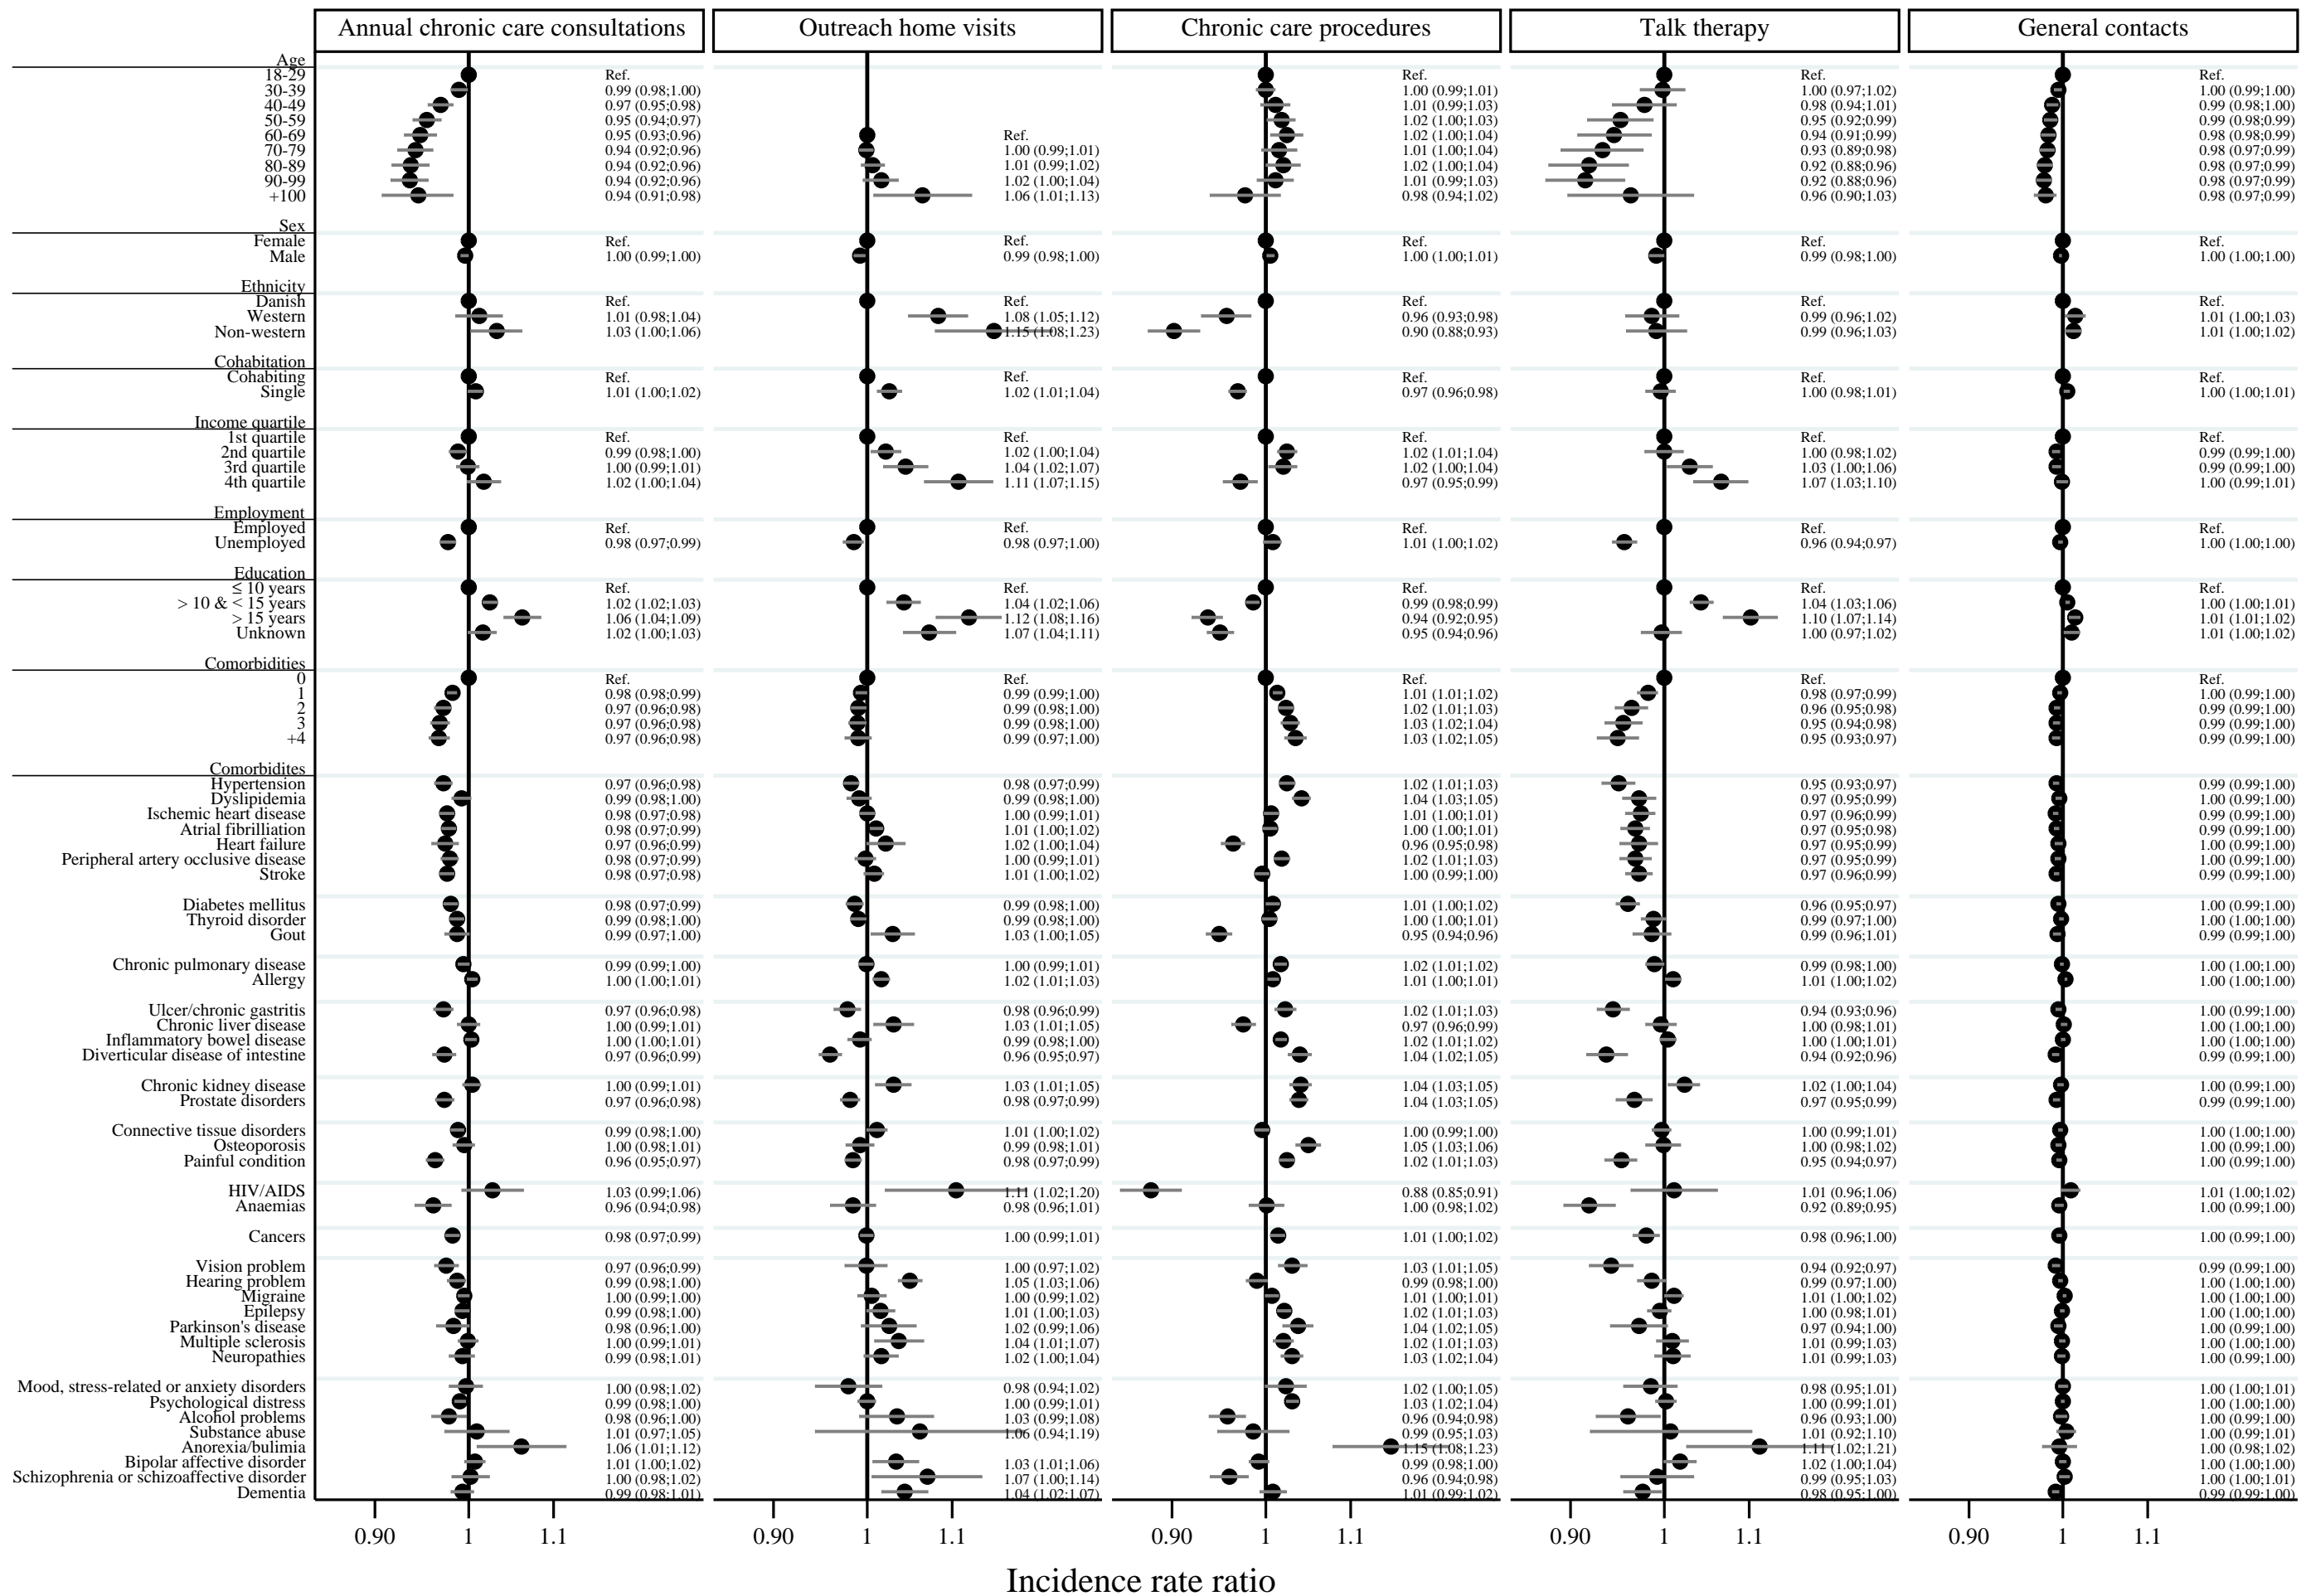

Figure S2. Associations between patient characteristics and general practice propensity to provide chronic care services
